# Supplementary material for: Trends in the adsorption and reactivity of hydrogen on magnesium silicate nanoclusters
Source: Royal Society of Chemistry journal article supplement (doi:10.1039/c4cp05128a), 2015-01-01

## Supplementary Information

### Trends in the Adsorption and Reactivity of Hydrogen on Magnesium Silicate Nanoclusters

Ichraf Oueslati<sup>a,b</sup>, Boutheïna Kerkeni<sup>a,c</sup> Stefan T. Bromley<sup>\*d,e</sup>

<sup>a</sup> Faculté des Sciences de Tunis, Département de Physique, (LPMC), Université de Tunis El Manar, 2092 Tunis, Tunisia

<sup>b</sup> Observatoire de Paris-Meudon, Sorbonne Universités UPMC Univ Paris 06, UMR8112 du CNRS, LERMA, 5 place Jules Janssen, 92195 Meudon Cedex, France

<sup>c</sup> Institut Supérieur des Arts Multimédia de la Manouba, Université de la Manouba, 2010 la Manouba, Tunisia

<sup>d</sup> Department de Química Física & Institut de Química Teòrica i Computacional, Universitat de Barcelona, C/ Martí i Franquès 1, E-08028 Barcelona, Spain

<sup>e</sup> Institució Catalana de Recerca i Estudis Avançats (ICREA), E-08010 Barcelona, Spain.

\*Corresponding author; E-mail: s.bromley@ub.edu

1. The extent of BSSE in our calculations for a range of H atom physisorption and chemisorption sites is detailed in tables (i) and (ii) below. See main text for discussion.  $E_{\text{bind}}^{\text{c}}$  denotes the BSSE-corrected  $E_{\text{bind}}$  value in each case.

Table (i) : Physisorption

|                       | Adsorption Site | $E_{\text{bind}}$ (kJ/mol) | BSSE (%) | $E_{\text{bind}}^{\text{c}}$ (kJ/mol) |
|-----------------------|-----------------|----------------------------|----------|---------------------------------------|
| <b>Nanopyroxene</b>   | P2              | 11                         | 38       | 7                                     |
| <b>Nano-olivine_a</b> | P1              | 7                          | 45       | 4                                     |
|                       | P2              | 9                          | 41       | 5                                     |
|                       | P3              | 17                         | 18       | 14                                    |

Table (ii) : Chemisorption

|                       | Adsorption Site | $E_{\text{bind}}$ (kJ/mol) | BSSE (%) | $E_{\text{bind}}^{\text{c}}$ (kJ/mol) |
|-----------------------|-----------------|----------------------------|----------|---------------------------------------|
| <b>Nanopyroxene</b>   | <b>C1</b>       | 69                         | 7        | 64                                    |
|                       |                 | 91                         | 7        | 85                                    |
|                       |                 | 200                        | 2        | 195                                   |
| <b>Nano-olivine_a</b> | <b>C1</b>       | 43                         | 9        | 37                                    |
|                       |                 | 92                         | 5        | 87                                    |
|                       |                 | 146                        | 3        | 141                                   |
|                       |                 | 272                        | 2        | 267                                   |
|                       | <b>C2</b>       | 91                         | 4        | 87                                    |
|                       |                 | 105                        | 4        | 101                                   |

2. Transition state structures corresponding to the “TS” labels in Fig. 10. Subscripts correspond to the figure showing the corresponding initial  $\text{H}_{\text{chem}}^+ + \text{H}_{\text{chem}}^-$  configuration.

TS<sub>6b</sub>

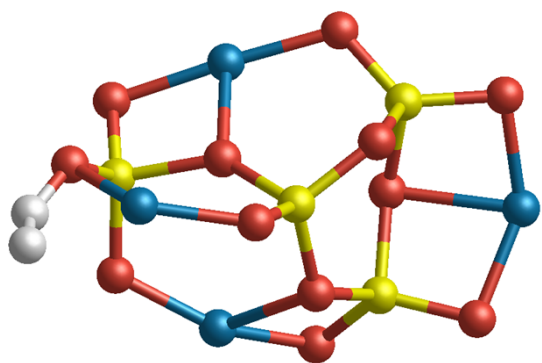

TS<sub>6d</sub>

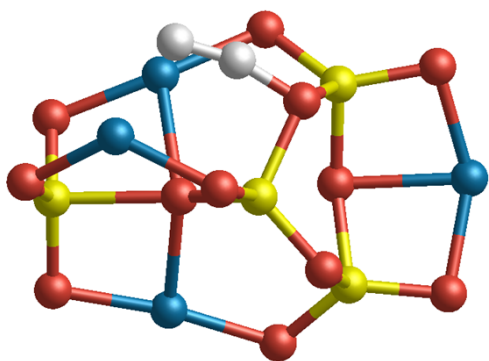

TS<sub>6e</sub>

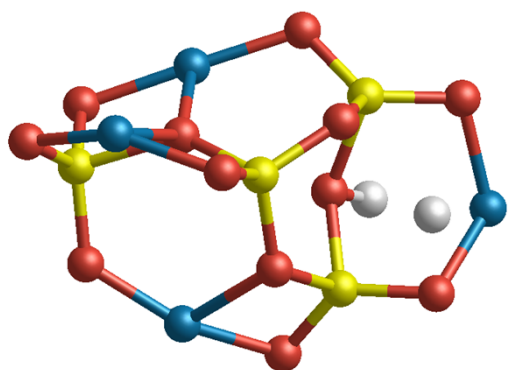

TS<sub>7d</sub>

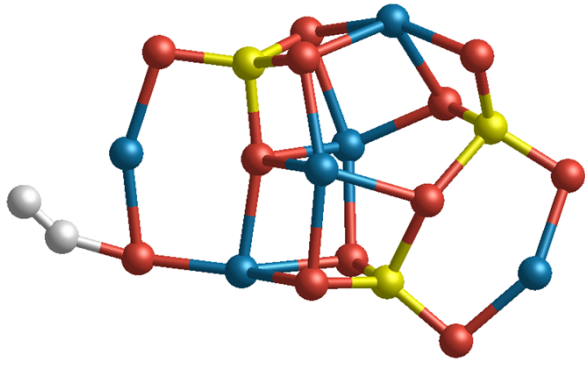

TS<sub>7g</sub>

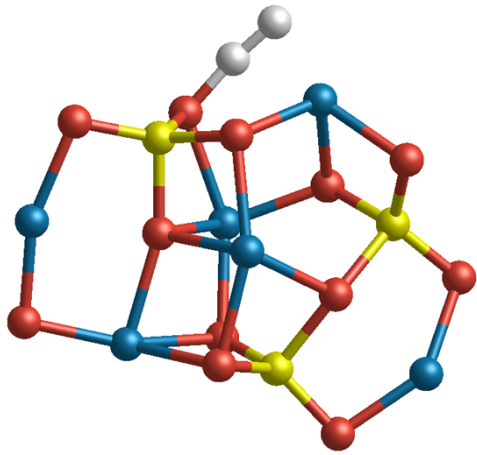

TS<sub>9a</sub>

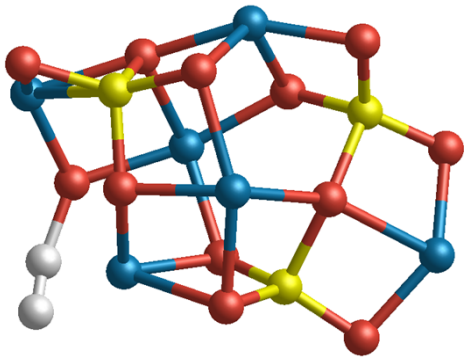

TS<sub>9b</sub>

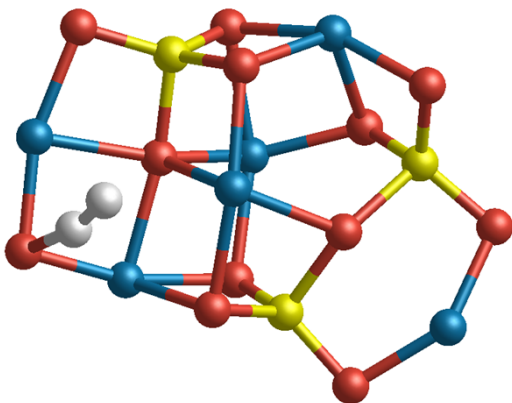

3. Lists of calculated vibrational frequencies for all transition states considered. The figure corresponding to the initial  $H^+_{chem.}+H^-_{chem}$  configuration is provided in parentheses. The single imaginary frequency is labelled with an "i" in each case.

| Species          | Frequency (cm-1)                                                                                                                                                                                                                                                                   |
|------------------|------------------------------------------------------------------------------------------------------------------------------------------------------------------------------------------------------------------------------------------------------------------------------------|
| TS <sub>6a</sub> | 1744 1688 1321 1155 1127 1118 1095 1066 1021 1000 971 956<br>928 893 889 836 774 741 723 717 704 645 634 619<br>602 567 536 526 494 485 472 451 437 420 403 392<br>371 354 335 327 295 284 275 264 258 246 235 223<br>208 200 176 155 153 153 140 130 121 86 55 1337i              |
| TS <sub>6b</sub> | 1776 1733 1305 1143 1130 1117 1095 1014 1005 997 970 949<br>930 917 870 822 765 741 730 714 699 663 652 622<br>603 593 560 557 519 501 472 459 450 420 411 395<br>380 358 342 328 313 287 271 265 250 246 230 225<br>207 195 186 163 152 148 137 101 97 87 56 1367i                |
| TS <sub>6d</sub> | 1603 1511 1430 1175 1153 1143 1114 11089 1028 978 952 924<br>911 884 846 804 749 743 730 718 702 691 651 624<br>609 595 584 546 529 500 485 455 443 428 407 394<br>384 367 363 322 314 300 288 280 263 247 244 223<br>4 205 189 176 164 152 139 126 109 76 66 1170i                |
| TS <sub>6e</sub> | 1817 1461 1400 1192 1167 1128 1107 1102 1071 1034 997 967<br>942 930 842 782 743 730 719 714 661 640 632 616<br>593 590 589 551 534 506 482 466 444 430 410 400<br>392 372 350 328 323 296 286 273 262 256 244 226<br>219 207 190 168 155 148 145 131 124 96 45 769i               |
| TS <sub>6f</sub> | 1795 1631 1263 1154 1135 1088 1067 1051 1031 1023 974 972<br>931 896 882 876 758 744 732 713 705 659 639 617<br>602 581 550 529 520 485 470 455 439 416 409 398<br>373 354 336 323 305 280 271 267 245 242 232 218<br>209 193 172 158 154 148 158 154 148 140 98 87 71 58 1373i    |
| TS <sub>7b</sub> | 1626 1484 1317 1171 1138 1117 1041 983 948 872 912 938<br>855 809 760 756 696 691 648 646 616 612 595 583<br>564 552 516 511 506 437 473 470 454 434 421 421<br>405 385 375 348 340 329 323 312 303 290 275 272<br>263 241 240 221 205 202 194 172 166 149 130 121<br>112 80 1111i |
| TS <sub>7c</sub> | 1779 1679 1328 1121 1115 1099 1036 990 946 929 880 877<br>865 840 791 764 693 675 653 629 611 604 590 582<br>557 552 535 519 502 490 482 454 443 424 418 400<br>392 376 348 339 329 321 313 305 286 278 268 266<br>252 248 235 219 203 199 176 165 155 148 140 128<br>92 82 1371i  |
| TS <sub>7d</sub> | 2138 1681 1227 1133 1120 1093 1016 946 932 908 884 872<br>844 779 758 741 709 668 636 631 623 603 602 581<br>561 554 545 531 505 490 478 456 442 422 416 397<br>393 374 356 346 327 321 315 302 281 276 272 251<br>247 238 231 206 194 179 169 158 148 136 133 96<br>87 61 999i    |

|                  |                                                                                                                                                                                                                                                                                    |
|------------------|------------------------------------------------------------------------------------------------------------------------------------------------------------------------------------------------------------------------------------------------------------------------------------|
|                  |                                                                                                                                                                                                                                                                                    |
| TS <sub>7e</sub> | 1944 1484 1165 1147 1121 1107 1002 969 925 902 877 855<br>847 809 774 748 680 674 658 627 599 585 566 553<br>544 539 523 512 494 463 457 435 419 405 388 386<br>382 362 357 339 334 312 301 296 279 259 256 252<br>231 221 218 192 181 164 159 147 139 121 74 63<br>44 27 420i     |
| TS <sub>7f</sub> | 1795 1631 1263 1154 1135 1088 1067 1051 1031 1023 974 972<br>931 896 882 876 758 744 732 713 705 659 639 617<br>602 581 550 529 520 485 470 455 439 416 409 398<br>373 354 336 323 305 280 271 267 245 242 232 218<br>209 193 172 158 154 148 158 154 148 140 98 87 71 58 1373i    |
| TS <sub>7g</sub> | 2185 1620 1383 1127 1097 1094 1063 1006 949 939 905 889<br>877 838 789 773 736 689 673 634 622 605 587 582<br>567 548 523 509 497 487 472 457 442 430 424 419<br>400 384 379 338 336 332 322 306 288 273 267 263<br>255 240 223 208 198 176 168 162 154 139 135 124<br>97 86 1037i |
| TS <sub>9a</sub> | 2280 1423 1320 1130 1116 1094 1010 948 945 908 875 861<br>828 781 746 741 671 656 645 625 615 610 606 592<br>569 554 538 532 506 500 491 481 469 437 432 420<br>400 377 360 353 339 326 322 317 295 287 282 270<br>250 244 230 226 182 165 155 148 133 120<br>88 81 696i           |
| TS <sub>9b</sub> | 2196 1682 1263 1130 1104 1100 1017 994 970 912 890 871<br>850 775 748 738 675 670 646 630 625 612 586 575<br>558 541 527 519 510 481 471 465 446 441 431 419<br>393 387 365 346 340 334 311 302 288 276 270 260<br>253 249 226 222 212 205 194 178 166 157 139 135<br>104 92 809i  |

4. Plot of  $2H_{\text{chem}} \rightarrow H_2$  recombination barrier height versus the binding energy of one H atom chemisorbed to the respective bare cluster in a C1 mode (i.e.  $H^+_{\text{chem}}$ ) for all reaction paths on nano-olivine\_a and nano-pyroxene clusters. The labelling of the data points follows that in Figs. 6, 7 and 9. Data from Goumans et al. (article ref [22]) corresponding to the foresterite (010) surface and from Kerkeni and Bromley (article ref [21]) corresponding to the nano-olivine\_c cluster are also shown.

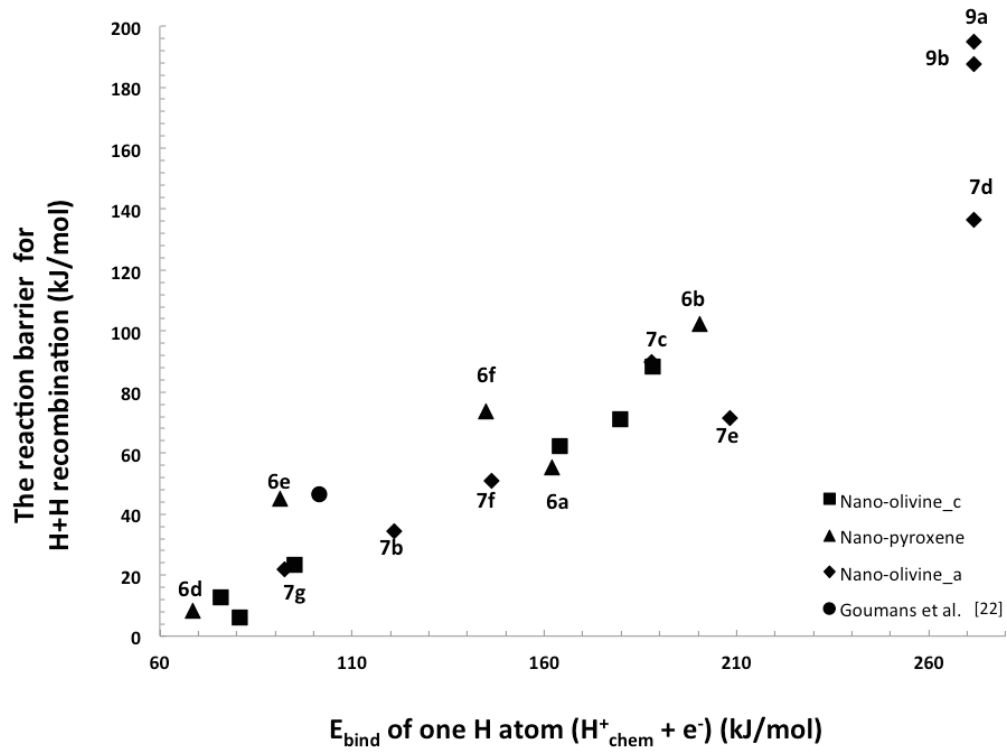

Supplement: c4cp05128a1.pdf [file c4cp05128a1.pdf]
